# Supplementary material for: The additive effects of atorvastatin and insulin on renal function and renal organic anion transporter 3 function in diabetic rats
Source: PubMed Central journal article supplement (PMC5648883; doi:10.1038/s41598-017-13206-5), 2017-10-19
Supplement: 41598_2017_13206_MOESM1_ESM.pdf [file 41598_2017_13206_MOESM1_ESM.pdf]

# **The additive effects of atorvastatin and insulin on renal function and renal organic anion transporter 3 function in diabetic rats**

Laongdao Thongnak<sup>1</sup>, Anchalee Pongchaidecha<sup>1</sup>, Krit Jaikumkao<sup>1</sup>, Varanuj Chatsudthipong<sup>2</sup>, Nipon Chattipakorn<sup>1,3</sup> and Anusorn Lungkaphin<sup>1\*</sup>

<sup>1</sup>Department of Physiology, Faculty of Medicine, Chiang Mai University, Chiang Mai, Thailand

<sup>2</sup>Department of Physiology, Faculty of Science, Mahidol University, Bangkok, Thailand

<sup>3</sup>Cardiac Electrophysiology Research and Training Center, Faculty of Medicine, Chiang Mai University, Chiang Mai, Thailand

## **\* Corresponding author**

AnusornLungkaphin, Department of Physiology, Faculty of Medicine,

Chiang Mai University, Intravaroros Road, Chiang Mai, Thailand 50200

Tel.: 6653-945362-4; fax: 6653-945365

E-mail address: onanusorn@yahoo.com; anusorn.lungka@cmu.ac.th

Supplementary information

Figure S1 for Figure 2

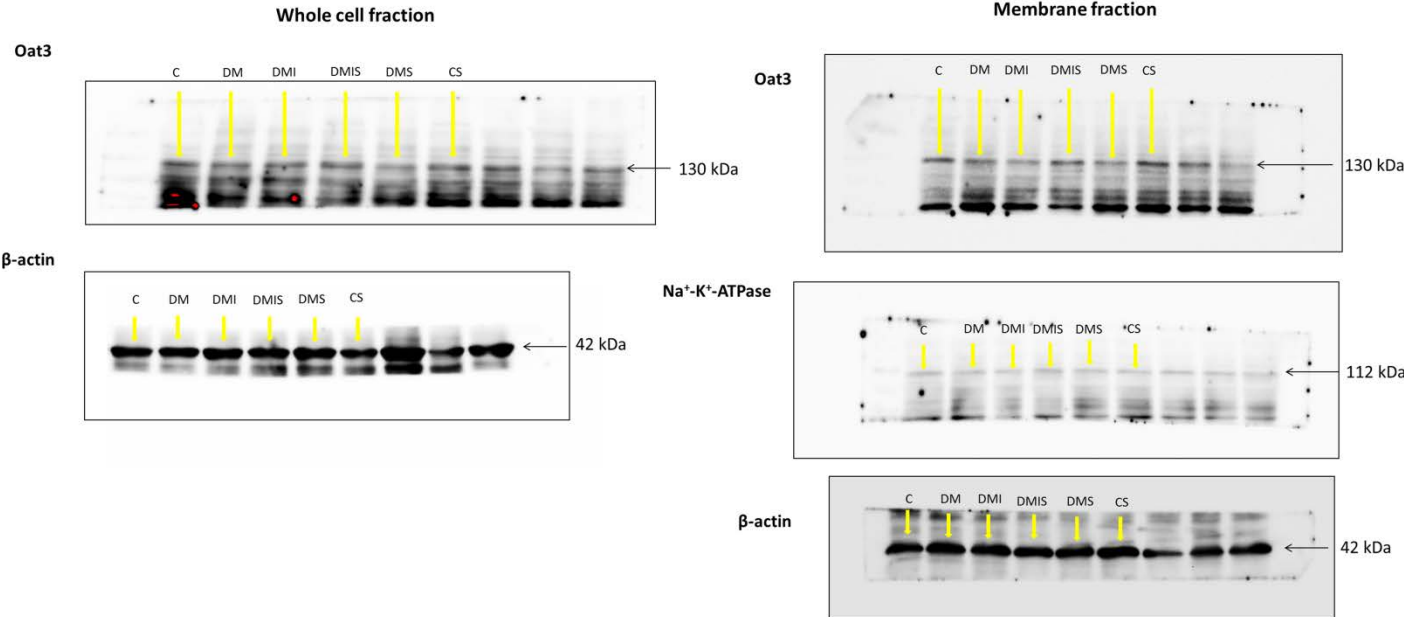

Figure S2 for Figure 3

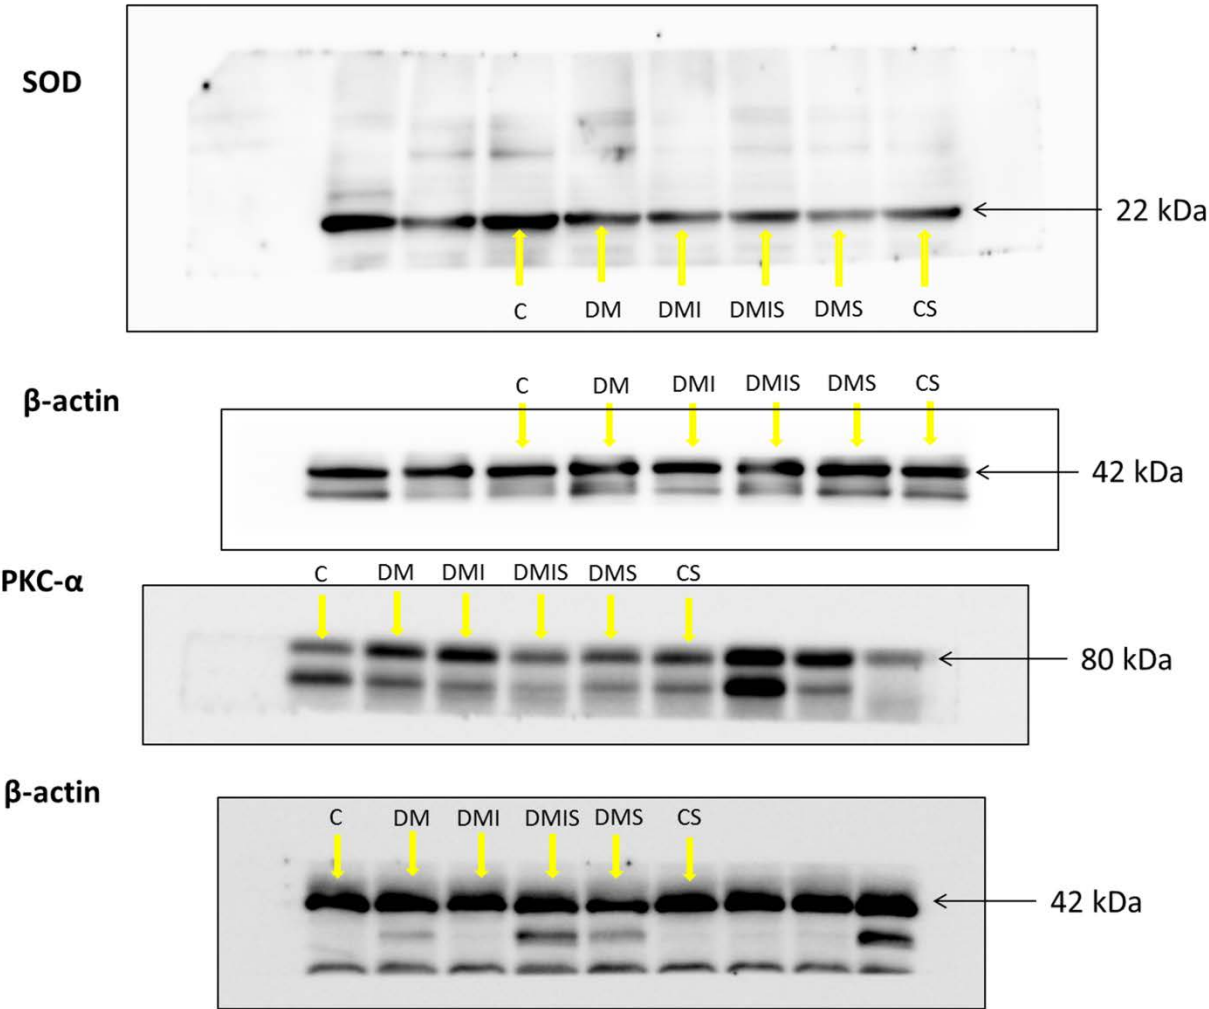

Figure S3 for Figure 4

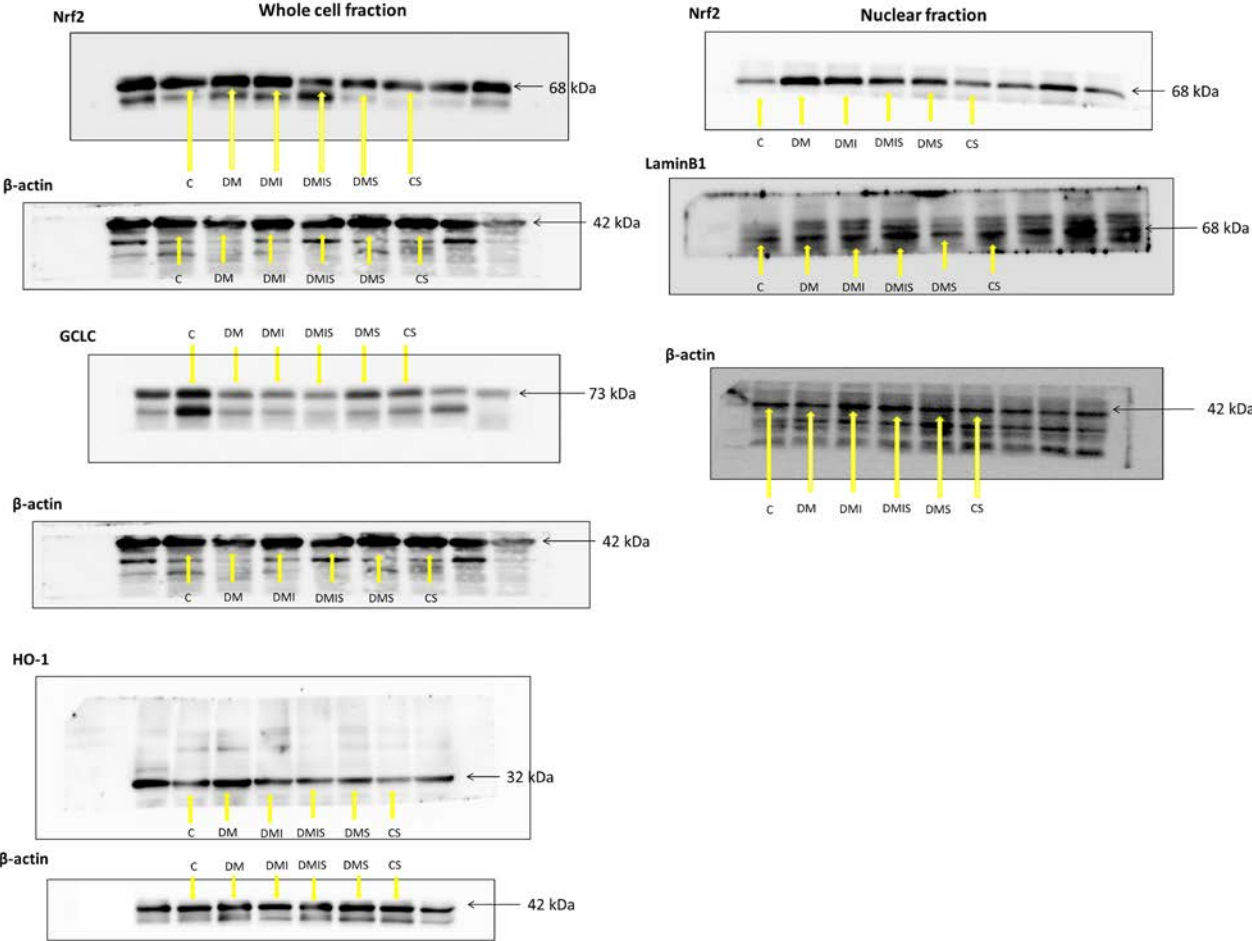

Figure S4 for Figure 5

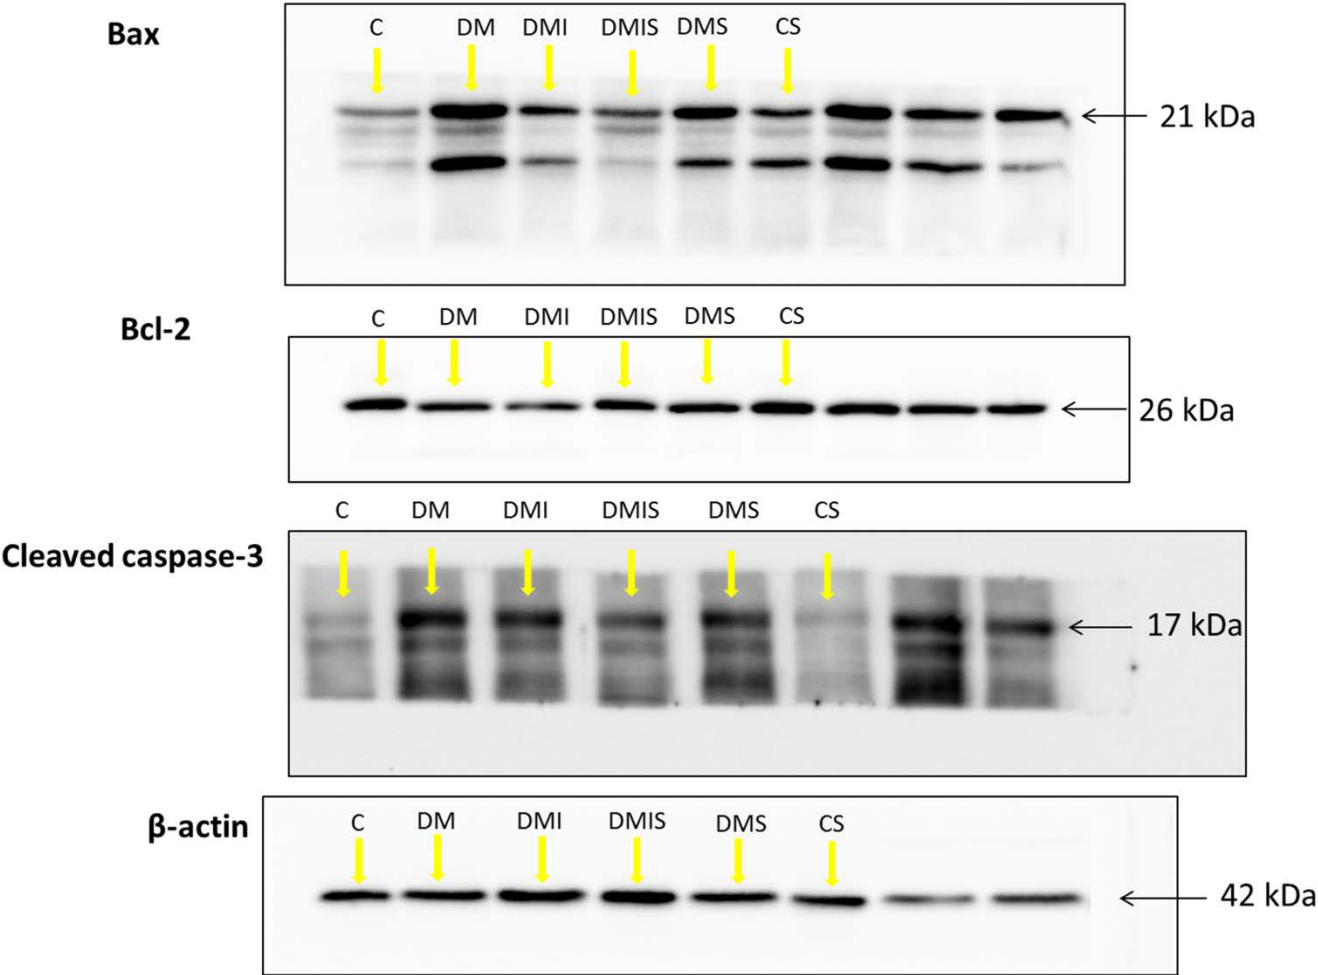

Figure S5 for Figure 6

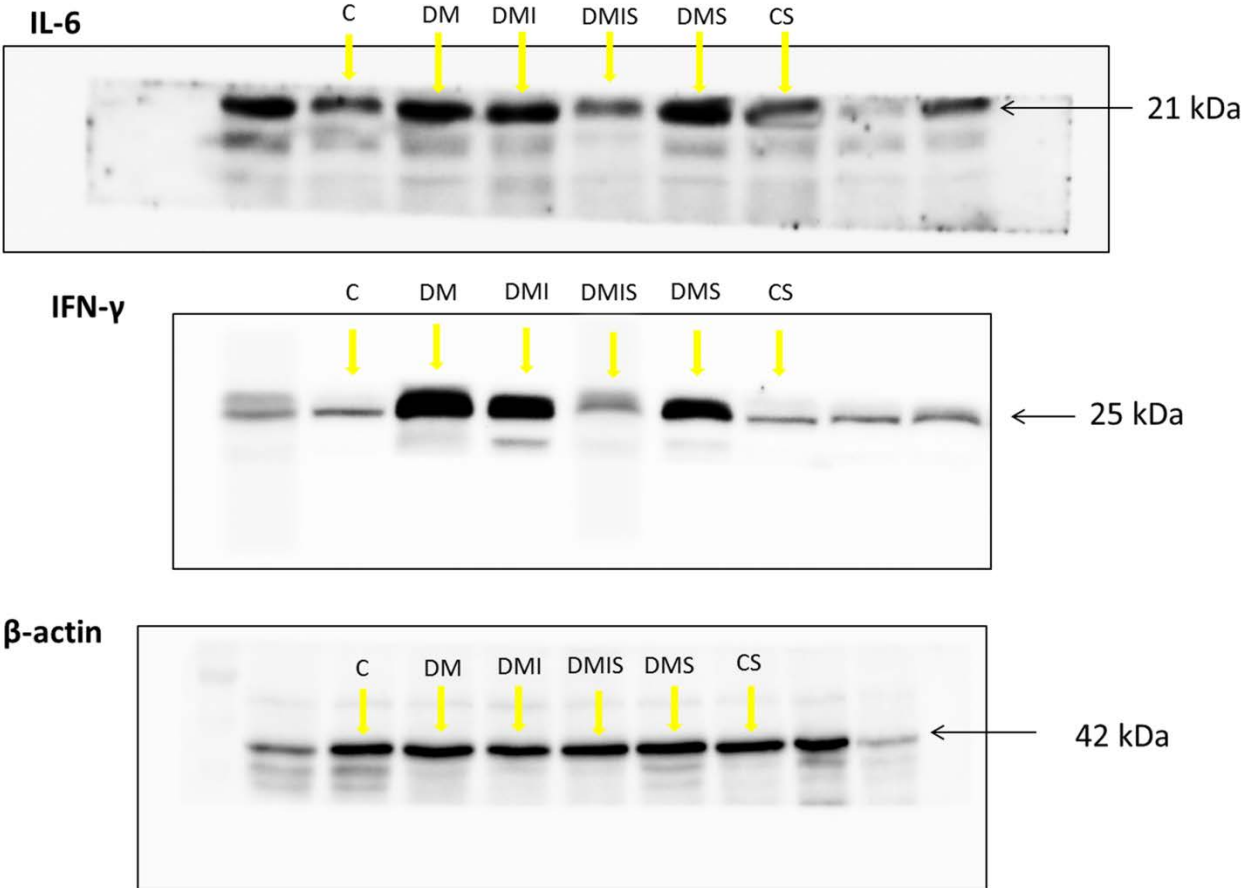

## Figure legends

**Figure S1.** Effects of pharmacological intervention on renal cortical Oat3 expression. Western blot analysis of Oat3 expression in whole cell lysate and membrane lysate fractions (full-length blots) were shown. Na<sup>+</sup>-K<sup>+</sup> ATPase was used as a marker for the membrane fraction. C - control group; DM - diabetic group; DMI - diabetic plus insulin group; DMIS - diabetic and insulin plus atorvastatin group; DMS - diabetic plus atorvastatin group; CS - control plus atorvastatin.

**Figure S2.** Effects of pharmacological intervention on renal cortical expression of SOD and PKC- $\alpha$ . Western blot analysis of SOD and PKC- $\alpha$  expression in the whole cell lysate fraction of renal cortical tissues (full-length blots) were shown. C - control group; DM - diabetic group; DMI - diabetic plus insulin group; DMIS - diabetic plus insulin and atorvastatin group; DMS - diabetic plus atorvastatin group; CS - control plus atorvastatin.

**Figure S3.** Effects of pharmacological intervention on the renal cortical expression of Nrf-2, GCLC and HO-1. Western blot analysis of Nrf2 expression in nuclear and whole cell lysate fractions, GCLC, and HO-1 of renal cortical tissues (whole cell lysate fraction) (full-length blots) were

shown. Lamin B1 was used as a marker for the nuclear fraction. C - control group; DM - diabetic group; DMI - diabetic plus insulin group; DMIS - diabetic and insulin plus atorvastatin group; DMS - diabetic plus atorvastatin group; CS - control plus atorvastatin.

**Figure S4.** Effects of pharmacological intervention on the expression of Bax, Bcl-2, and cleaved caspase-3 in pancreatic tissues. Western blot analysis of Bax, Bcl-2, and cleaved caspase-3 expressions in pancreatic tissues (full-length blots) were shown. C - control group; DM - diabetic group; DMI - diabetic plus insulin group; DMIS - diabetic and insulin plus atorvastatin group; DMS - diabetic plus atorvastatin group; CS - control plus atorvastatin.

**Figure S5.** Effects of pharmacological intervention on the expression of IL-6, and IFN- $\gamma$  in pancreatic tissues. Western blot analysis of IL-6 and IFN- $\gamma$  expressions in pancreatic tissues (full-length blots) were shown. C - control group; DM - diabetic group; DMI - diabetic plus insulin group; DMIS - diabetic and insulin plus atorvastatin group; DMS - diabetic plus atorvastatin group; CS - control plus atorvastatin.
